# Supplementary material for: PARP1 Stabilizes CTCF Binding and Chromatin Structure To Maintain Epstein-Barr Virus Latency Type
Source: PubMed Central journal article supplement (PMC6146685; doi:10.1128/jvi.00755-18), 2018-08-29
Supplement: zjv018183849s1.pdf [file zjv018183849s1.pdf]

**Table S1. Primers used in qPCR experiments**

| <b>Oligo</b>     | <b>Sequence (5' to 3')</b> | <b>Purpose</b> | <b>Genomic location</b> |
|------------------|----------------------------|----------------|-------------------------|
| Cp CTCF bs F'    | CACTCGCCCACTAACCTTAAC      | ChIP-qPCR      | 10486-10506             |
| Cp CTCF bs R'    | GGCCTGTAGTTTCGCATCTT       | ChIP-qPCR      | 10583-10564             |
| Qp CTCF bs F'    | CACCTCCCTGATAATGTCTTCAA    | ChIP-qPCR      | 50009-50031             |
| Qp CTCF bs R'    | ACCAGACAACATTACTGTGGAA     | ChIP-qPCR      | 50085-50064             |
| BZLF1 CTCF bs F' | CTGTCATGGACTCTAGTGTTGTG    | ChIP-qPCR      | 91212-91234             |
| BZLF1 CTCF bs R' | AGAAGGAGGAAGCAGCCATA       | ChIP-qPCR      | 91310-91291             |
| LMP1 CTCF bs F'  | TCTAGGAAGAAGGCTAGGAAGAA    | ChIP-qPCR      | 168414-168436           |
| LMP1 CTCF bs R'  | CAACGCAGTCTTAGGTATCTGG     | ChIP-qPCR      | 168515-168494           |
| Cp TSS-3 F'      | GTCCA CTACATATCCACTCTT     | MeDIP-qPCR     | 10820-10842             |
| Cp TSS-3 R'      | GGCCTAGGGTGCATGTTTA        | MeDIP-qPCR     | 10894-10912             |
| Cp TSS-2 F'      | TCGAGTGCTATCTTTGGAACAG     | MeDIP-qPCR     | 10986-11007             |
| Cp TSS-2 R'      | TGAGCTCTTATTGGCTATAATCC    | MeDIP-qPCR     | 11066-11090             |
| Cp TSS-1 F'      | ATTCGCCACGACTTGAAA         | MeDIP-qPCR     | 11243-11252             |
| Cp TSS-1 R'      | AAATTTGCAGCAGAACACAGAG     | MeDIP-qPCR     | 11313-11334             |
| Cp TSS+1 F'      | CCTCATCGCAGGGTTCTTAC       | MeDIP-qPCR     | 11380-11399             |
| Cp TSS+1 R'      | GGCCCTTAGACTTACGGTTTAG     | MeDIP-qPCR     | 11473-11494             |
| GusB F'          | CGCCCTGCCTATCTGTATTC       | qRT-PCR        | N/A                     |
| GusB R'          | TCCCCACAGGGAGTGTGTAG       | qRT-PCR        | N/A                     |
| Cp F'            | CCTCATCGCAGGGTTCTTAC       | qRT-PCR        | 11380-11399             |
| Cp R'            | GCTGTTTCTTCAGTCGGTTTAG     | qRT-PCR        | 11640-11626             |
| EBNA2 F'         | CTTAGCCAGTAACCCAGCAC       | qRT-PCR        | 36095-36108             |
| EBNA2 R'         | CGGGTGCTTAGAAGGTTGTT       | qRT-PCR        | 36185-36166             |
